# Supplementary material for: A systematic review on integrated care for traumatic brain injury, mental health, and substance use
Source: PubMed Central journal article supplement (PMC8893633; doi:10.1371/journal.pone.0264116), 2022-03-03
Supplement: pone.0264116.s002.pdf [file pone.0264116.s002.pdf]

Supplementary Table 2. Study Characteristics and Risk of Bias Assessment

| Study (Author, Year, Country)          | Study Design & Objective                                                                                                 | Sample Characteristics                                                                                                            | TBI and MHSU Information                                            |                                                                 | Integration Information |                                                                                                                                                                                                                                                  |       |          | WHO Strategic Approach | Facilitator                                                                               | Barrier                                                                                                                                                                                                                                                                                                                       | Risk of Bias Assessment                     |
|----------------------------------------|--------------------------------------------------------------------------------------------------------------------------|-----------------------------------------------------------------------------------------------------------------------------------|---------------------------------------------------------------------|-----------------------------------------------------------------|-------------------------|--------------------------------------------------------------------------------------------------------------------------------------------------------------------------------------------------------------------------------------------------|-------|----------|------------------------|-------------------------------------------------------------------------------------------|-------------------------------------------------------------------------------------------------------------------------------------------------------------------------------------------------------------------------------------------------------------------------------------------------------------------------------|---------------------------------------------|
|                                        |                                                                                                                          |                                                                                                                                   | TBI Severity/Time Since Injury (Mean ± SD, Years, Unless Specified) | Type of MHSU/Time Since Dx (Mean ± SD, Years, Unless Specified) | Activity                | Description                                                                                                                                                                                                                                      | Level | Type     |                        |                                                                                           |                                                                                                                                                                                                                                                                                                                               |                                             |
| Ahmed et al., 2016<br>United States    | Case Study<br><br>Integrated model of care to address physical, cognitive, and psychiatric needs among individuals w/TBI | N=1<br>- Gender: Man<br>- Age [Year]: 31 at time of tx; 24 at time of TBI<br>- Marital Status: Divorced<br>- Education: GED       | Severe/7 years                                                      | ADHD/<br>Elementary school; MDD/NR                              | Program                 | Program of Enhanced Psychiatric Services (PEP) (Outpatient psychiatric brain injury clinic)<br>- Individual and gp psychotherapy + pharmacotherapy<br>- Weekly multidisciplinary team meetings<br>- Individualized tx plans<br>- Family meetings | Meso  | Service  | 1.1<br>1.4             | - Integrating family members<br>- Staff experienced in managing behavioural sx's from TBI | - Geographic distance b/t PEP and neurorehabilitation outpatient program                                                                                                                                                                                                                                                      | - Selection<br>- Reporting<br>- Information |
| Albrecht et al., 2017<br>United States | Qualitative<br><br>Explore perception of barriers and facilitators to dx and tx of MHSU after TBI                        | N=33 (10 HCP; 18 patients; 5 caregivers)<br>- Gender [Men]: 83% Patients; 40% Caregivers; HCP NR                                  | Mild-Severe/<br>18 mos-5 years                                      | Depression;<br>Anxiety; PTSD/NR                                 | Screening, Treatment    | Dx and tx of MHSU after TBI                                                                                                                                                                                                                      | Meso  | Clinical | 4                      | - Positive and engaged caregiver support                                                  | - Lack of education about TBI and MHSU among patients, HCP, and caregivers<br>- Lack of experience with TBI and MHSU among HCP --> reluctance to dx, which delays tx<br>- polypharmacy --> complicates tx of TBI and MHSU<br>- Limited access to care due to insurance, transportation, income, and availability of providers | N/A                                         |
| Andrew et al., 2017<br>South Africa    | Cohort<br><br>Incorporate questions re: cognition and MHSU sx's to TBI screening tool to identify patients for referral  | N=47<br>- Sex [Males]: 94%<br>- Age [Years]: 16 to 75; mean 35<br>- Employment [Unemployed]: 36% Pre-injury; 11% at time of study | Mild/moderate (N=11); Severe (N=32); Unknown (N=4)/NR               | Depression;<br>Anxiety;<br>Hallucinations/NR                    | Screening               | Screening for MHSU among individuals with TBI to improve referral and patient outcome                                                                                                                                                            | Meso  | Clinical | 4                      | - Interpreter and family/caregiver support                                                | - Communication (due to language and education) --> lack of understanding of some questions<br>- Cultural differences --> difficulty defining depression and personality change                                                                                                                                               | N/A                                         |





|                         |                                                                                                                                                      |                                                                                                                                                                                                                                                                                                                                                                                                                                                                                                                                                                                                                                                                                                                                                                                                                                                                                    |                                                                      |                                                                                                        |           |                                                                                                                                                                                                                                                                                                                                                |       |          |            |                                                                                                                                                                                              |     |                                                                                    |
|-------------------------|------------------------------------------------------------------------------------------------------------------------------------------------------|------------------------------------------------------------------------------------------------------------------------------------------------------------------------------------------------------------------------------------------------------------------------------------------------------------------------------------------------------------------------------------------------------------------------------------------------------------------------------------------------------------------------------------------------------------------------------------------------------------------------------------------------------------------------------------------------------------------------------------------------------------------------------------------------------------------------------------------------------------------------------------|----------------------------------------------------------------------|--------------------------------------------------------------------------------------------------------|-----------|------------------------------------------------------------------------------------------------------------------------------------------------------------------------------------------------------------------------------------------------------------------------------------------------------------------------------------------------|-------|----------|------------|----------------------------------------------------------------------------------------------------------------------------------------------------------------------------------------------|-----|------------------------------------------------------------------------------------|
| Bay et al., 2017        | Case Study                                                                                                                                           | N=1<br>- Gender: Man<br>- Age [Years]: 90<br>- Employment: Retired<br>- Education: "Well-educated"<br>- Marital Status: Widowed (following 73 year relationship/marriage)                                                                                                                                                                                                                                                                                                                                                                                                                                                                                                                                                                                                                                                                                                          | NR/NR                                                                | Depression/Prior to TBI                                                                                | Treatment | Case management with caregiver:<br>- Case manager plans for natural support system, family education, crisis intervention for maintaining QOL; recommends sx management, reducing loneliness and depression, limiting health service use<br>- Case manager with family to make changes at home and activities for within and outside of home   | Micro | Clinical | 1.1<br>4.1 | - Knowledge of evidence-based practice, protocols, and pathways --> case manager communicate effectively w/interdisciplinary professional and others to engage in proactive patient advocacy | N/A | - Selection<br>- Reporting<br>- Information                                        |
| Bédard et al., 2014     | RCT                                                                                                                                                  | N=76 (38 Tx; 38 Control)                                                                                                                                                                                                                                                                                                                                                                                                                                                                                                                                                                                                                                                                                                                                                                                                                                                           | Tx:<br>NR/4.5 ± 4.1                                                  | Depression/NR                                                                                          | Treatment | MBCT:<br>- customized to address issues associated with TBI                                                                                                                                                                                                                                                                                    | Micro | Clinical | 1.1        | N/A                                                                                                                                                                                          | N/A | - Nondifferential misclassification<br>- Selection<br>- Attrition<br>- Performance |
| Canada                  | Examine efficacy of MBCT for depression among individuals w/TBI                                                                                      | Tx:<br>- Sex [Males]: 50%<br>- Age [Mean ± SD, Years]: 47.1 ± 12.0<br>- Marital Status: Married/Common law (58%); Single (26%); Separated/Divorced/Widowed (13%); Unknown (3%)<br>- Employment: Employed (37%); Unemployed (21%); Homemaker/Volunteer (11%); Retired (11%); Other (21%)<br>- Education: Elementary (3%); Some Secondary (11%); Completed Secondary (32%); Some Post-Secondary (11%); Completed Post-Secondary (45%)<br><br>Control:<br>- Sex [Males]: 60%<br>- Age [Mean ± SD, Years]: 45.8 ± 14.8<br>- Marital Status: Married/Common law (45%); Single (31%); Separated/Divorced/Widowed (24%); Unknown (0%)<br>- Employment: Employed (24%); Unemployed (26%); Homemaker/Volunteer (0%); Retired (16%); Other (34%)<br>- Education: Elementary (5%); Some Secondary (11%); Completed Secondary (18%); Some Post-Secondary (16%); Completed Post-Secondary (50%) | Control:<br>NR/4.0 ± 3.5                                             |                                                                                                        |           |                                                                                                                                                                                                                                                                                                                                                |       |          |            |                                                                                                                                                                                              |     |                                                                                    |
| Bombardier et al., 2017 | RCT                                                                                                                                                  | N=100 (40 CBT-T; 18 CBT-IP; 42 UC)                                                                                                                                                                                                                                                                                                                                                                                                                                                                                                                                                                                                                                                                                                                                                                                                                                                 | CBT:<br>"complicated, mild/moderate" (69%); Severe (31%)/3.41 ± 2.84 | Depression/NR                                                                                          | Treatment | CBT-T and CBT-IP<br>- adaptations to make protocol more accessible for people with cognitive impairment<br><br>UC:<br>- Notified by phone of depression status and encouraged to continue using rehabilitation and primary care services<br>- Free to self-refer to MHSU services outside of study<br>- Local MH resources provided to patient | Micro | Clinical | 1.1        | N/A                                                                                                                                                                                          | N/A | - Selection<br>- Nondifferential misclassification<br>- Ascertainment<br>- Recall  |
| United States           | Explore relationship between depression severity and cognition, behaviour, and physical activity among individuals w/TBI receiving tx for depression | CBT:<br>- Sex [Males]: 59%<br>- Age [Mean ± SD, Years]: 45.4 ± 14.1<br>- Race/ Ethnicity: Non-Hispanic White (90%)<br>- Marital Status: Single/Never Married (31%); Married/Partnered (19%); Divorced (41%); Separated (5%); Widowed (2%); Other (2%)<br>- Education: Some College (45%); Undergrad Degree (16%); Grad Degree (5%); Tech/Vocational (9%); High School Diploma (14%); ≤High School/GED (12%)<br><br>UC:<br>- Sex [Males]: 69%<br>- Age [ Mean ± SD, Years]: 46.3 ± 12.4<br>- Race/ Ethnicity: Non-Hispanic White (90%)<br>- Marital Status: Single (29%); Married/Partnered (31%); Divorced (36%); Separated (5%)<br>- Education: Some College (45%); Undergrad Degree (17%); Grad Degree (17%); Tech/Vocational (5%); High School Diploma (5%); ≤High School/GED (12%)                                                                                             | UC: "complicated, mild/moderate" (69%); Severe (31%)/3.21 ± 2.58     | Other MHSU:<br>Current Dysthymic (12%); Alcohol Abuse (10%); Substance Abuse (4%); hx of PTSD (18%)/NR |           |                                                                                                                                                                                                                                                                                                                                                |       |          |            |                                                                                                                                                                                              |     |                                                                                    |















|                      |                          |                                                                                                                                                                            |                                                                              |                        |           |                                                                                                                                              |       |          |     |                                                                                                                                                                                         |                                                                                                                                                                                          |                                                                             |
|----------------------|--------------------------|----------------------------------------------------------------------------------------------------------------------------------------------------------------------------|------------------------------------------------------------------------------|------------------------|-----------|----------------------------------------------------------------------------------------------------------------------------------------------|-------|----------|-----|-----------------------------------------------------------------------------------------------------------------------------------------------------------------------------------------|------------------------------------------------------------------------------------------------------------------------------------------------------------------------------------------|-----------------------------------------------------------------------------|
| Juengst et al., 2015 | Before-After, No Control | N=20<br>- Sex [Males]: 60%<br>- Age [Mean ± SD, Years]: 36.7 ± 12.4<br>- Race: 95%<br>- Marital Status: Married (30%)<br>- Education [Mean ± SD, Years]: 15.0 ± 2.3        | *Complicated mild to severe TBI <sup>a</sup> / 5.2 ± 3.6                     | Depression; Anxiety/NR | Screening | iPerform (user-centred cross-platform smartphone application) for self-monitoring of depression and anxiety sx                               | Meso  | Clinical | 3.5 | - Simplicity w/application interface and question content and style<br>- Effective and efficient communication pathways b/t individuals and clinicians/researchers<br>- Proper training | - Redundant and complex language<br>- Alternating assessments (e.g., multiple scales for different questions, differing time frames of references for different questions) --> confusion | N/A                                                                         |
| Jurick et al., 2020  | RCT                      | N=100<br>- Age (Mean ± SD, Years): 34.4 ± 7.9<br>- Sex [Males]: 89%<br>- Race: Caucasian (70%)<br>- Education (Mean ± SD, Years): 13.7 ± 1.8                               | Mild, moderate/5.4 ± 3.5                                                     | PTSD/NR                | Treatment | SMART-CPT:<br>- All standard components and structures of CPT<br>- Adaptations made to mTBI and cognitive complaints                         | Micro | Clinical | 1.1 | N/A                                                                                                                                                                                     | N/A                                                                                                                                                                                      | - Information<br>- Performance<br>- Attrition<br>- Selection                |
| Kaimal et al., 2019  | Cross-sectional          | N=204<br>Sex: N=204 Males N=12 Females (as reported in study)                                                                                                              | N=57 Unknown; N=47 Mild; N=20 Moderate; N=1 Severe (as reported in study)/NR | PTSD/NR                | Treatment | Long-term art therapy program in outpatient integrative medical care facility<br>- Group and individual therapy                              | Meso  | Clinical | 1.1 | N/A                                                                                                                                                                                     | N/A                                                                                                                                                                                      | - Information<br>- Reporting<br>- Selection<br>- Low survey completion rate |
| Kip et al., 2019     | Before-After, No Control | N=202<br>- Age [Mean ± SD, Years]: 43.0 ± 12.8<br>- Sex [Males]: 90.1%<br>- Race: White (83.6%); Black (12.9%); Other (3.5%)<br>- Education [Mean ± SD, Years]: 14.5 ± 2.7 | Mild (N=48); Moderate/Severe (N=49)/NR                                       | PTSD/NR                | Treatment | Accelerated Resolution Therapy:<br>- Relaxation and orientation<br>- Imaginal exposure<br>- Imagery rescripting<br>- Assessment and closeout | Micro | Clinical | 1.1 | N/A                                                                                                                                                                                     | N/A                                                                                                                                                                                      | - Selection<br>- Performance                                                |













|                    |                                                                                                                                                                                                             |                                                                                                                                                                                                                                                                                                                                                                                                                                         |                                                       |                                                                                                        |           |                                                                           |       |          |     |                                                                                                                                                                                                                                                      |     |                                                              |
|--------------------|-------------------------------------------------------------------------------------------------------------------------------------------------------------------------------------------------------------|-----------------------------------------------------------------------------------------------------------------------------------------------------------------------------------------------------------------------------------------------------------------------------------------------------------------------------------------------------------------------------------------------------------------------------------------|-------------------------------------------------------|--------------------------------------------------------------------------------------------------------|-----------|---------------------------------------------------------------------------|-------|----------|-----|------------------------------------------------------------------------------------------------------------------------------------------------------------------------------------------------------------------------------------------------------|-----|--------------------------------------------------------------|
| Wolf et al., 2018  | Before-After, No Control                                                                                                                                                                                    | N=44<br>- Sex [Males]: 93.2%<br>- Age [Mean ± SD, Years]: 33.2 ± 7.34<br>- Ethnicity: Caucasian (70.5%); Hispanic (18.2%); African American (9.1%); Other (2.3%)<br>- Marital Status: Married (50%); Single (38.6%); Separated/Divorced (11.4%)                                                                                                                                                                                         | Mild (65.9%);<br>Moderate/Severe (34.1%)/ 4.42 ± 2.99 | PTSD;<br>Depression (88.6%); Other Anxiety (27.3%); Substance Abuse (29.5%); hx of Suicide (29.5%)/ NR | Treatment | Prolonged exposure<br>- Modifications to accommodate TBI-related deficits | Micro | Clinical | 1.1 | - Modifications to accommodate TBI-related deficits<br>- Compensatory devices to provide support and corrective instruction<br>- "teach-back" method to ensure understanding of content and instructions<br>- recorded sessions and patient handouts | N/A | - Selection<br>- Performance<br>- Reporting                  |
| United States      | Examine generalization of the effectiveness of prolonged exposure therapy for PTSD in improving post-concussive sx's and other outcomes in military service members and veterans w/hx of mild to severe TBI |                                                                                                                                                                                                                                                                                                                                                                                                                                         |                                                       |                                                                                                        |           |                                                                           |       |          |     |                                                                                                                                                                                                                                                      |     |                                                              |
| Yount et al., 2013 | Case Study                                                                                                                                                                                                  | N=2<br>- Gender [Men]: 100%                                                                                                                                                                                                                                                                                                                                                                                                             | NR/NR                                                 | PTSD/NR                                                                                                | Treatment | Training of service dogs for fellow veterans                              | Micro | Clinical | 1.1 | N/A                                                                                                                                                                                                                                                  | N/A | - Selection<br>- Information<br>- Reporting<br>- Performance |
| United States      | Demonstrate effects of service dog training as purpose-driven intervention on PTSD sx's and mTBI                                                                                                            |                                                                                                                                                                                                                                                                                                                                                                                                                                         |                                                       |                                                                                                        |           |                                                                           |       |          |     |                                                                                                                                                                                                                                                      |     |                                                              |
| Zhang et al., 2017 | RCT                                                                                                                                                                                                         | N=36 (18 Intervention; 18 Control)                                                                                                                                                                                                                                                                                                                                                                                                      | Mild-moderate/NR                                      | Major depressive episode/NR                                                                            | Treatment | Methylphenidate                                                           | Micro | Clinical | 1.1 | N/A                                                                                                                                                                                                                                                  | N/A | - Selection<br>- Information                                 |
| China              | Compare effect of methylphenidate w/placebo in patients with TBI in China                                                                                                                                   | Intervention:<br>- Age [Mean ± SD, Years]: 36.3 ± 10.9<br>- Sex [Males]: 72.2%<br>- Ethnicity: Han (66.7%); Hui (33.3%)<br>- Education: Elementary School (22.2%); High School (44.4%); College/University (33.3%)<br><br>Control:<br>- Age [Mean ± SD, Years]: 34.9 ± 12.1<br>- Sex [Males]: 77.8%<br>- Ethnicity: Han (55.6%); Hui (44.4%)<br>- Education: Elementary School (33.3%); High School (33.3%); College/University (33.3%) |                                                       |                                                                                                        |           |                                                                           |       |          |     |                                                                                                                                                                                                                                                      |     |                                                              |

**ACT:** Acceptance and Commitment Therapy; **ADHD:** Attention deficit hyperactivity disorder; **B/t:** between; **CBT:** Cognitive behavioural therapy; **CBT-T:** Cognitive behavioural therapy - telephone; **CBT-IP:** Cognitive behavioural therapy - in person; **CPT:** Cognitive processing therapy; **Dx:** Diagnosis; **ED:** Emergency department; **GCS:** Glasgow Coma Scale; **Gp:** Group; **HCP:** Healthcare professional; **Hx:** History; **IC:** Integrated care; **LOC:** Loss of consciousness; **LT:** Long-term; **MCBT:** Mindfulness based cognitive behavioural therapy; **MDD:** Major depressive disorder; **MH:** Mental health; **MHSU:** Mental health and/or substance use; **Mos:** Months; **mTBI:** Mild traumatic brain injury; **N/A:** Not applicable; **NR:** Not reported; **OCD:** Obsessive compulsive disorder; **OSU-OT:** Occupational therapy; **TBI-ID:** Ohio State University Traumatic Brain Injury Identification Method; **PT:** Physiotherapy; **PTSD:** Post-traumatic stress disorder; **QoL:** Quality of life; **rTMS:** Repetitive transcranial magnetic stimulation; **RCT:** Randomized controlled trials; **SD:** Standard deviation; **SLP:** Speech language pathology; **SPT:** Supportive psychotherapy; **SUD:** Substance use disorder; **Sxs:** Symptoms; **TBI:** Traumatic brain injury; **UC:** Usual care; **Tx:** Treatment; **W/:** With
